# Supplementary material for: The Japanese Workplace PERMA-Profiler: A validation study among Japanese workers
Source: PubMed Central journal article supplement — J Occup Health. 2018 Aug 17;60(5):383–93. doi: 10.1539/joh.2018-0050-OA (PMC6176035; doi:10.1539/joh.2018-0050-oa), 2018-08-17
Supplement: 1348-9585-60-383-s001.pdf [file 1348-9585-60-383-s001.pdf]

## The Japanese Workplace PERMA-Profiler

以下の1~23の文章を読んで、「0」から「10」の中から、当てはまる数字を一つ選び、回答例のように「○」をつけて下さい。

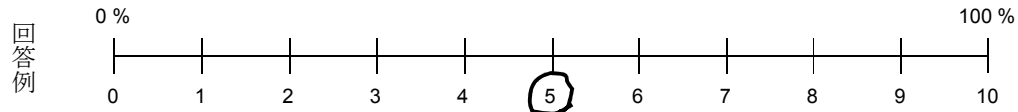

1 あなたの仕事は、どの程度目的や意味のあるものですか。

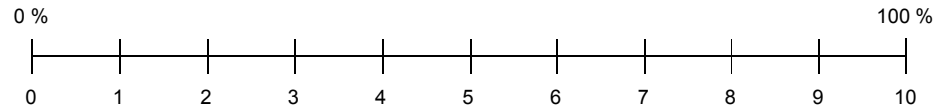

2 あなたは仕事に関する目標達成に向かって進んでいると、どのくらいの頻度で感じますか。

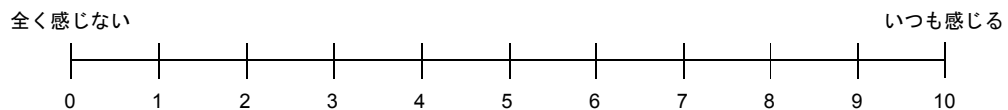

3 職場で、あなたはどのくらいの頻度で、自分のしていることに没頭していますか。

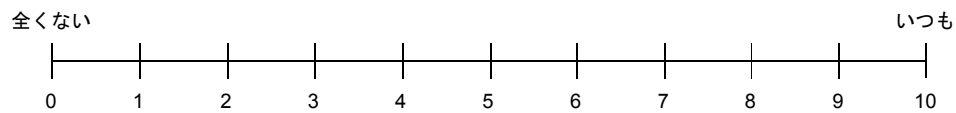

4 通常、あなたの健康状態は、どうであると思いますか。

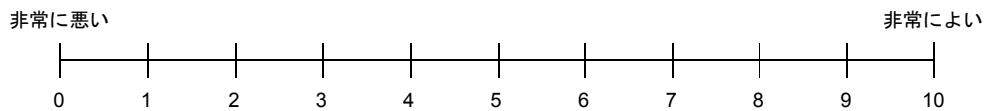

5 職場で、あなたはどのくらいの頻度で楽しいと感じますか。

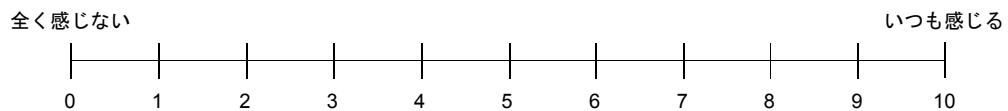

6 あなたは、必要なときに職場の人達から手助けや協力を、どの程度得ていますか。

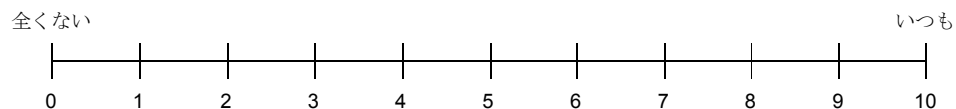

7 職場で、あなたはどのくらいの頻度で不安だと感じますか。

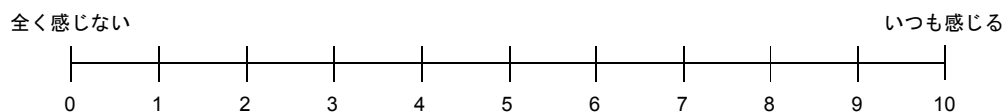

|    |                                                                                                                                                                                                                              |
|----|------------------------------------------------------------------------------------------------------------------------------------------------------------------------------------------------------------------------------|
| 8  | <p>あなたは自分で立てた仕事上の大切な目標を、どのくらいの頻度で達成できますか。</p> <p>全くできない <span style="float: right;">いつもできる</span></p> 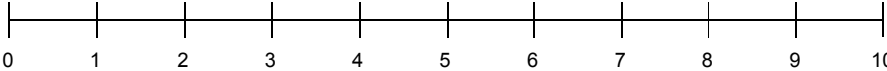 <p>0 1 2 3 4 5 6 7 8 9 10</p>       |
| 9  | <p>通常、あなたは職場で自分のしていることが、重要で価値のあることだと、どの程度感じますか。</p> <p>全く感じない <span style="float: right;">いつも感じる</span></p>  <p>0 1 2 3 4 5 6 7 8 9 10</p> |
| 10 | <p>職場で、あなたはどのくらいの頻度で前向き（ポジティブ）だと感じますか。</p> <p>全く感じない <span style="float: right;">いつも感じる</span></p>  <p>0 1 2 3 4 5 6 7 8 9 10</p>          |
| 11 | <p>あなたは自分の仕事にどの程度わくわくしたり、興味を感じたりしますか。</p> <p>0% <span style="float: right;">100%</span></p>  <p>0 1 2 3 4 5 6 7 8 9 10</p>                 |
| 12 | <p>あなたは職場でどのくらい孤独を感じますか。</p> <p>全く感じない <span style="float: right;">いつも感じる</span></p>  <p>0 1 2 3 4 5 6 7 8 9 10</p>                      |
| 13 | <p>あなたは現在の健康状態にどのくらい満足していますか。</p> <p>0% <span style="float: right;">100%</span></p>  <p>0 1 2 3 4 5 6 7 8 9 10</p>                       |
| 14 | <p>職場で、あなたはどのくらいの頻度で怒りを感じますか。</p> <p>全く感じない <span style="float: right;">いつも感じる</span></p>  <p>0 1 2 3 4 5 6 7 8 9 10</p>                 |
| 15 | <p>あなたは職場の人達から感謝されていると、どの程度感じていますか。</p> <p>全く感じない <span style="float: right;">いつも感じる</span></p>  <p>0 1 2 3 4 5 6 7 8 9 10</p>           |
| 16 | <p>あなたはどのくらいの頻度で、仕事上の責任を果たすことができますか。</p> <p>全く果たせない <span style="float: right;">いつも果たせる</span></p>  <p>0 1 2 3 4 5 6 7 8 9 10</p>        |

|    |                                            |           |           |
|----|--------------------------------------------|-----------|-----------|
| 17 | 通常、方向性を持って仕事をしていると、あなたはどの程度感じますか。          | 0 %       | 100 %     |
|    |                                            | 0         | 10        |
| 18 | 同年代で同性の人達と比べて、あなたの健康状態はどうですか。              | 非常に悪い     | 非常によい     |
|    |                                            | 0         | 10        |
| 19 | あなたは職務上の人間関係に、どのくらい満足していますか。               | 全く満足していない | 完全に満足している |
|    |                                            | 0         | 10        |
| 20 | 職場で、あなたはどのくらいの頻度で悲しいと感じますか。                | 全く感じない    | いつも感じる    |
|    |                                            | 0         | 10        |
| 21 | 楽しんで仕事をしているとき、あなたはどのくらいの頻度で時間がたつのを忘れますか。   | 全くない      | いつも       |
|    |                                            | 0         | 10        |
| 22 | 職場で、あなたはどの程度満足していると感じますか。                  | 全く感じない    | いつも感じる    |
|    |                                            | 0         | 10        |
| 23 | すべてを考え合わせると、あなたは今の仕事に就いていて、どれくらい幸せだと思いますか。 | 0 %       | 100 %     |
|    |                                            | 0         | 10        |

Note. If you want to use the Japanese version of Workplace PERMA-Profiler, please contact the first author, Kazuhiro Watanabe. E-mail address: [kzwatanabe-ky@umin.ac.jp](mailto:kzwatanabe-ky@umin.ac.jp)
